# Supplementary material for: Targeted point mutations of the m6A modification in miR675 using RNA-guided base editing induce cell apoptosis
Source: PubMed Central journal article supplement (PMC7201566; doi:10.1042/bsr20192933), 2020-05-05
Supplement: BSR-2019-2933_supp.pdf [file BSR-2019-2933_supp.pdf]

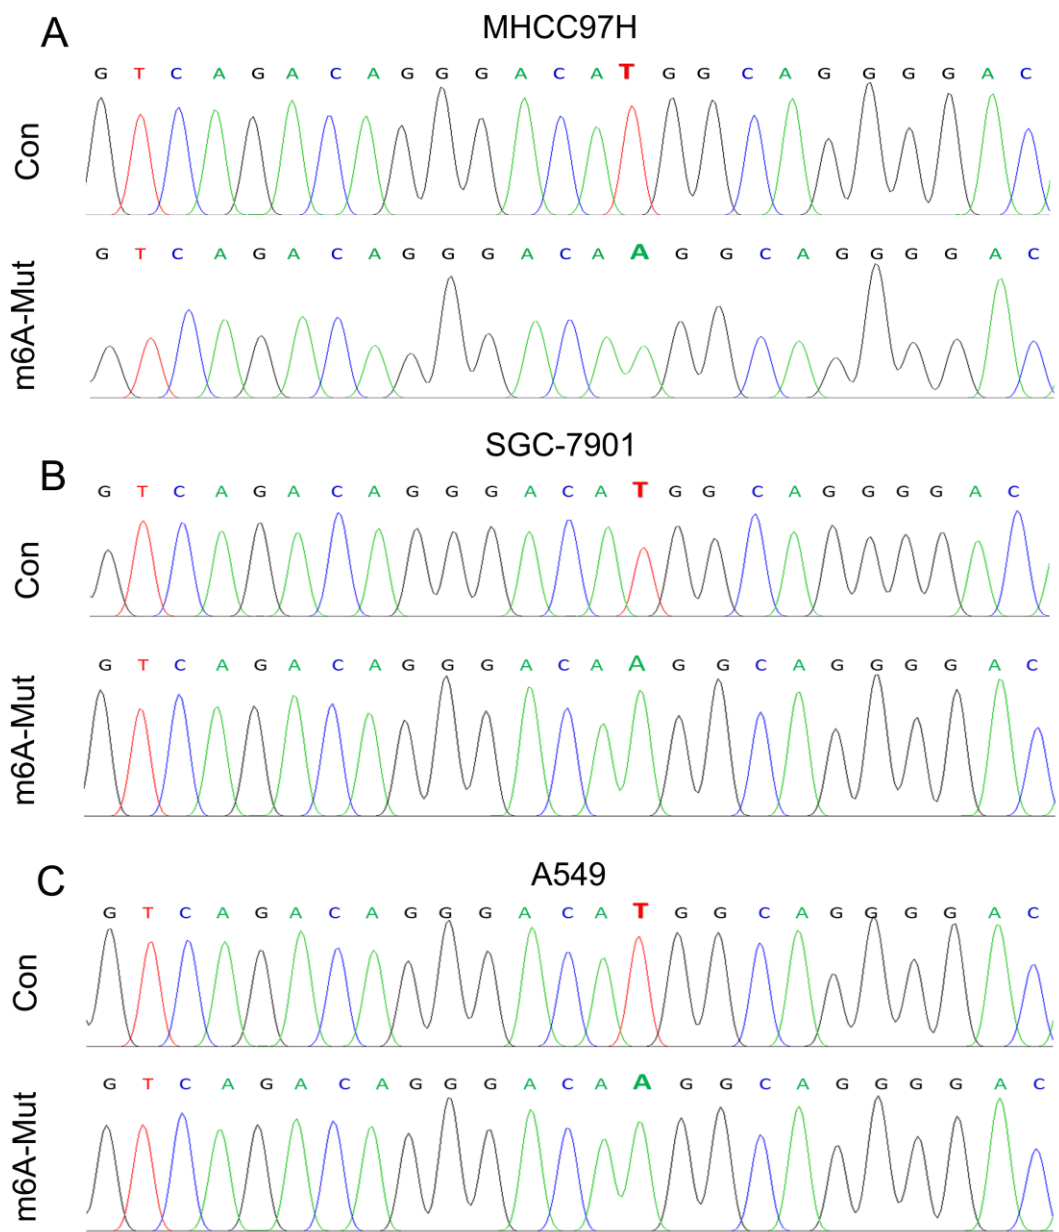

Figure S1. Sequencing analysis of the m<sup>6</sup>A modification site. Mutated m<sup>6</sup>A modification site in MHCC97H (A), SGC-7901 (B), and A549 (C) cells.

Table S1 Sequence of sgRNA

| <i>SgRNAs</i> | Sequences (5'→3')       | PAM |
|---------------|-------------------------|-----|
| <i>SgRNA1</i> | F: AGGGACATGGCAGGGGACAC | AGG |
|               | R: GTGTCCCCTGCCATGTCCCT |     |
| <i>SgRNA2</i> | F: GGACACAAAACCCTCTAGCT | TGG |
|               | R: AGCTAGAGGGTTTTGTGTCC |     |

Table S2 Sequence of miRNA

| Genes            | Annealing<br>(°C) | Sequences (5'→3')                               |
|------------------|-------------------|-------------------------------------------------|
| <i>MIR675-5P</i> | 60                | CTCAACTGGTGTCTGGAGTCGGCAATTCAGTTGAGC<br>ACTGTGG |
| <i>MIR675-3P</i> | 60                | CTCAACTGGTGTCTGGAGTCGGCAATTCAGTTGAGT<br>GAGCGGT |
| <i>U6</i>        | 60                | CGCTTCACGAATTTGCGTGTCAT                         |

Table S3 Primers of miRNA for qRT-PCR analysis

| Genes            | Annealing<br>(°C) | Primer sequences (5'→3')                                    |
|------------------|-------------------|-------------------------------------------------------------|
| <i>MIR675-5P</i> | 60                | F: ACACTCCAGCTGGGTGGTGCGGAGAGGGCCC<br>R: CAGTGCGTGTCGTGGAGT |
| <i>MIR675-3P</i> | 60                | F: ACACTCCAGCTGGGCTGTATGCCCTCAC<br>R: CAGTGCGTGTCGTGGAGT    |
| <i>U6</i>        | 60                | F: GCTTCGGCAGCACATATACTAAAAT<br>R: CGCTTACGAATTTGCGTGTCAT   |

Table S4 Primers of m6A related genes for qRT-PCR analysis

| Genes          | Annealing | Primer sequences (5'→3')                                   | Reference            |
|----------------|-----------|------------------------------------------------------------|----------------------|
| <i>METTL3</i>  | 60        | F: GAGGAGTGCATGAAAGCCAG<br>R: GGCCTCAGAATCCATGCAAG         | (Feng et al. 2018)   |
| <i>METTL14</i> | 60        | F: GACGGGGACTTCATTCATGC<br>R: CCAGCCTGGTCGAATTGTAC         | (Feng et al. 2018)   |
| <i>ALKBH5</i>  | 60        | F: ACCCCATCCACATCTTCGAG<br>R: CTTGATGTCCTGAGGCCGTA         | (Feng et al. 2018)   |
| <i>FTO</i>     | 60        | F: AGACACCTGGTTTGGCGATA<br>R: CCAAGGTTCCCTGTTGAGCAC        | (Feng et al. 2018)   |
| <i>YTHDF2</i>  | 60        | F: GAACCTTACTTGAGTCCACAG<br>R: GTAGGGCATGGCTGTGTCAC        | (Melissa et al.2018) |
| <i>WTAP</i>    | 60        | F: TGCGACTAGCAACCAAGGAA<br>R: ATCTCAGTTGGGCAACGCTC         | (Melissa.et al.2018) |
| <i>H19</i>     | 60        | F: AAAGACACCATCGG AACAGC<br>R: AGAGTCGTGGAGGCTTTGAA        | (Hao et al. 2017)    |
| <i>GAPDH</i>   | 60        | F: TCTCCTCTGACTTCAACAGCGACA<br>R: CCCTGTTGCTGTAGCCAAATTCGT | (Feng et al. 2018)   |
